# Supplementary material for: Involvement of GPR17 in Neuronal Fibre Outgrowth
Source: MDPI journal article supplement (doi:10.3390/ijms222111683), 2021-10-28
Supplement: s1 [file s1]

## Involvement of GPR17 in neuronal fibre outgrowth

Max Braune<sup>1</sup>, Nico Scherf<sup>2</sup>, Claudia Heine<sup>1</sup>, Katja Sygnecka<sup>1</sup>, Thanigaimalai Pillaiyar<sup>3</sup>, Chiara Parravicini<sup>4</sup>, Bernd Heimrich<sup>5</sup>, Maria P. Abbracchio<sup>4</sup>, Christa E. Müller<sup>3</sup> and Heike Franke<sup>1\*</sup>

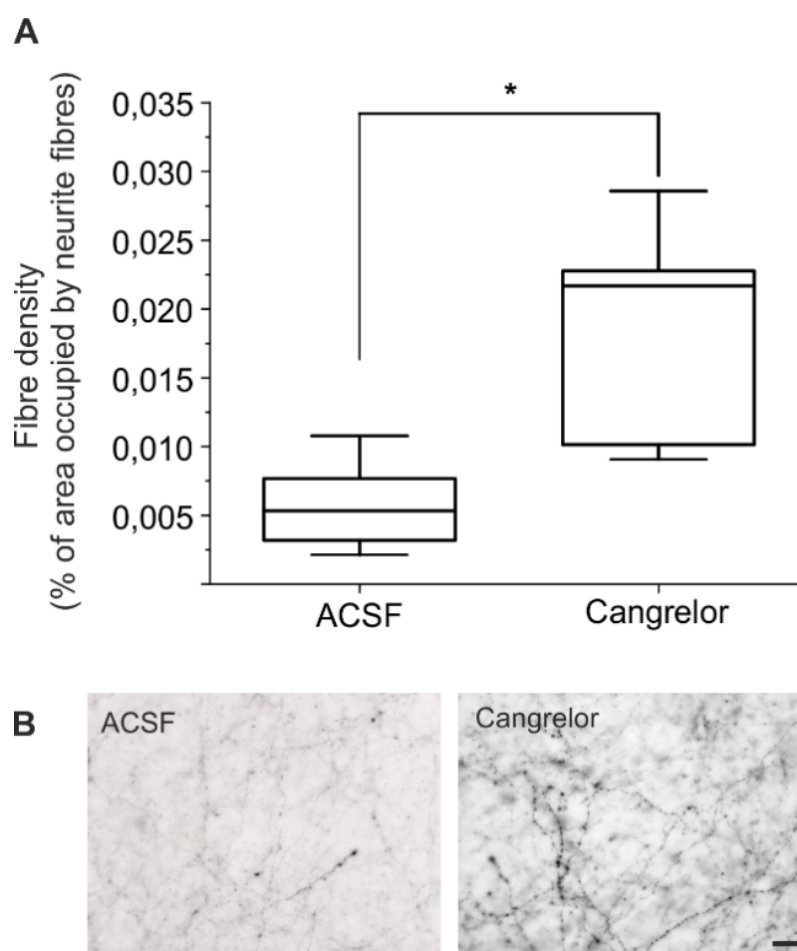

**Figure S1.** Neurite outgrowth quantification. **(A)** Organotypic dopaminergic slice co-cultures were treated with 0.1 nM Cangrelor and ACSF (vehicle treated control). Data are shown as box plots. The number of animals being used was  $n > 4$ . Statistical analysis was done using t-test with Welch correction  $t(4.34607) = -3.28534$ ;  $p = 0.02685$ . **(B)** Pictures of biocytin-labelled fibres in the border region after application of ACSF and Cangrelor. Scale bar: 20  $\mu\text{m}$  (for all).

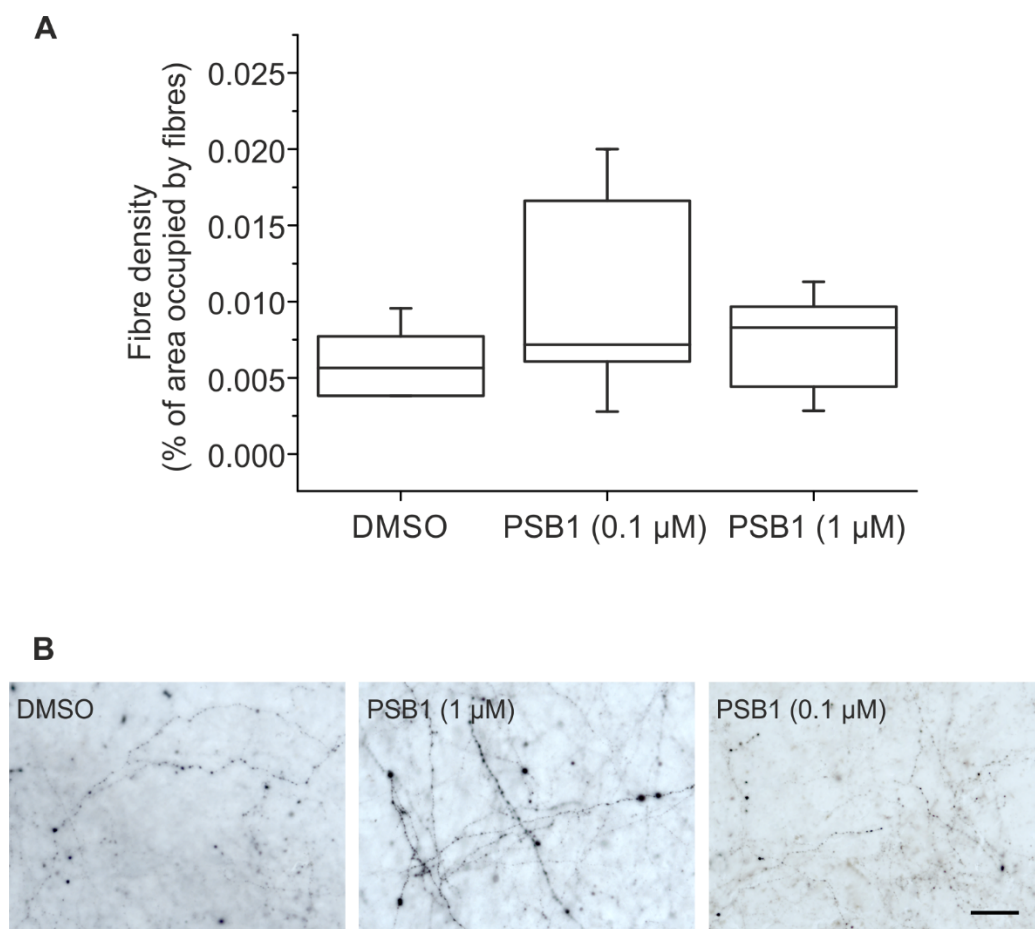

**Figure S2.** Neurite outgrowth quantification. (A) Organotypic dopaminergic slice co-cultures were treated with 0.1 µM and 1 µM PSB, respectively. All treatments were compared to vehicle treated control (0.01% DMSO). Data are shown as box plots. The number of animals being used was  $n \geq 4$ . Statistical analysis was done using one-way ANOVA on Ranks. (B) Pictures of biocytin-labelled fibres in the border region after application of DMSO, PSB-16282 (PSB1; 1 µM) and PSB-16282 (PSB1; 0.1 µM). Scale bar: 20 µm (for all).

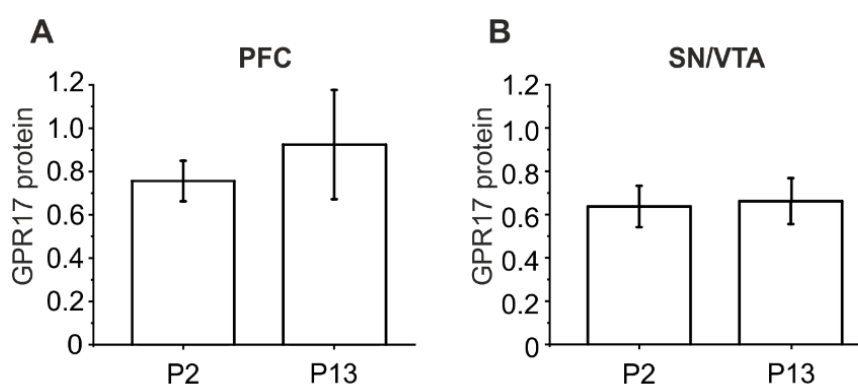

**Figure S3.** Results of Western blot of GPR17 *in vivo*. Protein expression of GPR17 is shown on P2 and P13 old rats in PFC (A) and SN/VTA (B), data are shown as bar charts. The number of animals being used was  $n \geq 3$ . In (A) for statistical analysis Mann-Whitney-Test was used, because distributions differed between both groups, Shapiro-Wilk  $p < 0.05$ . There was no statistically significant difference ( $U = 7$ ,  $Z = -0.14434$ ,  $p = 0.88523$ ). In (B) for statistical analysis t-test was applied showing no statistically significant difference ( $t(4) = -0.15674$ ;  $p = 0.88304$ ).

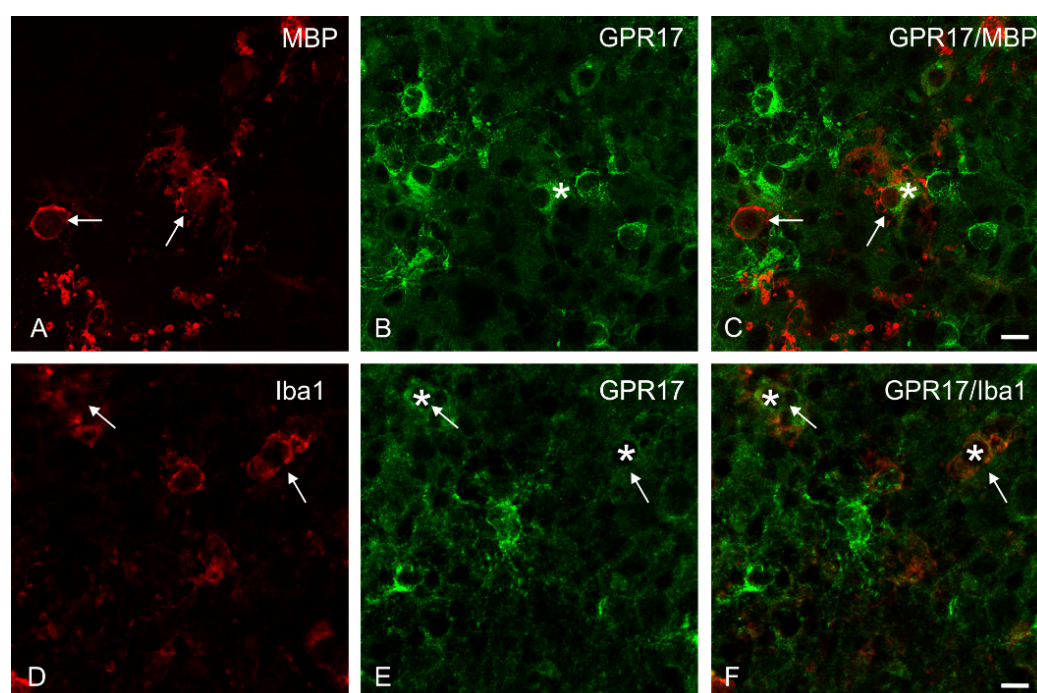

**Figure S4.** Multiple immunofluorescence study. Representative confocal images of GPR17 fluorescence signals in organotypic slice co-cultures. (A-C) Examples of a moderate expression of GPR17 on MBP-positive cells. (D-F) Examples of the expression of GPR17 on activated Iba1-positive microglial cells. (The stars indicate GPR17-positive cells. The thin arrows indicate the co-expression). Scale bars: A-D = 10  $\mu$ m.

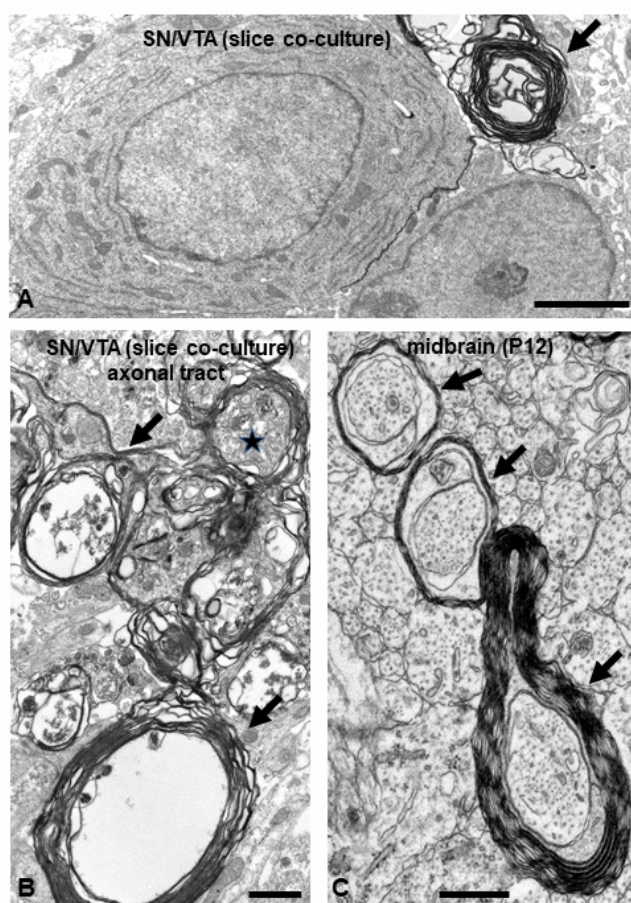

**Figure S5:** Electron microscopy of periaxonal myelin-like lamellae. Electron microscopy in slice co-cultures of SN/VTA and the PFC and in postnatal ventral midbrain. (A) Ultrastructural image of a myelin-like lamellar structural element (arrow) in the VTA/SN of the slice co-cultures at DIV 10. Neighboring obviously viable cell somata myelin-like lamellae of irregular appearance were observed. (B) Electron micrograph of a cross section through a fibre bridge developed between SN/VTA and PFC in the co-culture at DIV 10. Membranous-like elements varying in numbers of lamellae suggest wrapping neuronal profiles (arrows). Asterisk points to a circular lamellar rim filled with electron-dense material suggesting a neuronal profile which is undergoing degeneration. (C) Cross-sectioned axonal profiles in the ventral midbrain at P12. Axons vary in diameter and contain numerous microtubules. Most of the axons lack detectable myelin-like sheaths. Very few axons display myelin-like lamellae (arrows). Scale bar: A = 2,5  $\mu$ m; B = 1  $\mu$ m; C = 500 nm.
